# Supplementary material for: Boolean model of growth signaling, cell cycle and apoptosis predicts the molecular mechanism of aberrant cell cycle progression driven by hyperactive PI3K
Source: PLOS journal article supplement (doi:10.1371/journal.pcbi.1006402), 2019-03-15
Supplement: S5 (10.1371/journal.pcbi.1006402.s005) [file journal.pcbi.1006402.s005]

**A**

**Complex attractor in**  
*GF<sub>High</sub>* = ON & Trail = OFF

**B**

**Asynchronous cell cycle attractor**  
*GF<sub>High</sub>* = ON & Trail = OFF

---

**random order asynchronous**

**averaging over all micro states  
with unique cell cycle activity  
profiles**

**biased order asynchronous**

**collection of all samples G1 states in which the activity  
of all nodes in the modules below is the same:**

Restr.  
SW

ORC

Cell cycle phase SW

C. Cycle  
proc.
