# Supplementary material for: Boolean model of growth signaling, cell cycle and apoptosis predicts the molecular mechanism of aberrant cell cycle progression driven by hyperactive PI3K
Source: PLOS journal article supplement (doi:10.1371/journal.pcbi.1006402), 2019-03-15

Supplementary Figure 6

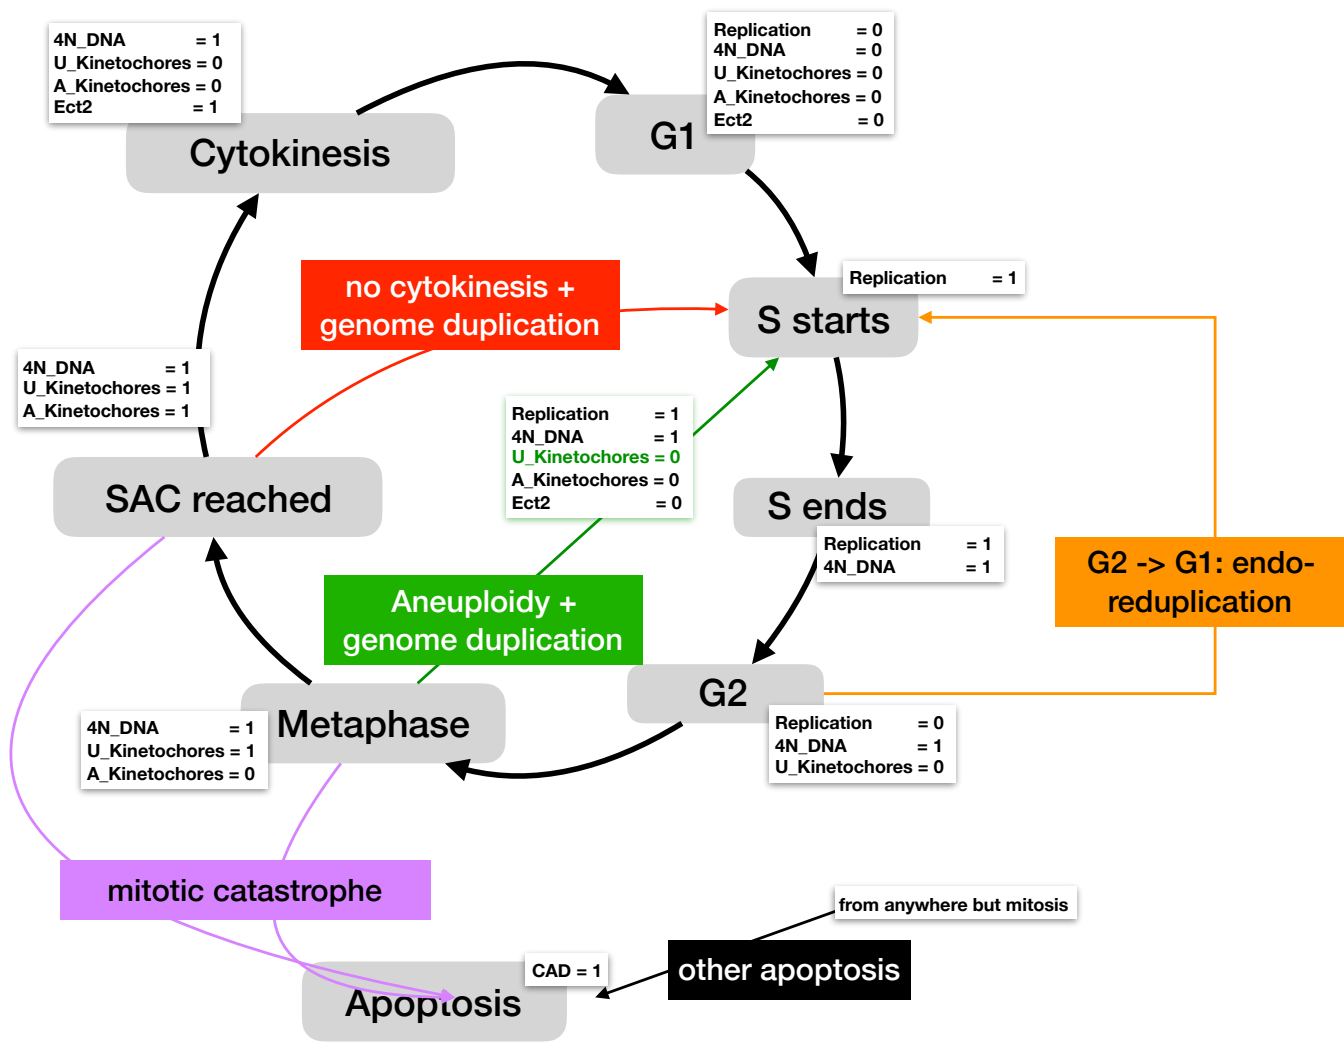

Supplement: S6 (10.1371/journal.pcbi.1006402.s006) [file journal.pcbi.1006402.s006]
